# Supplementary material
Source: ML conference proceedings conference paper supplement (https://aclanthology.org/2026.semeval-1.68)

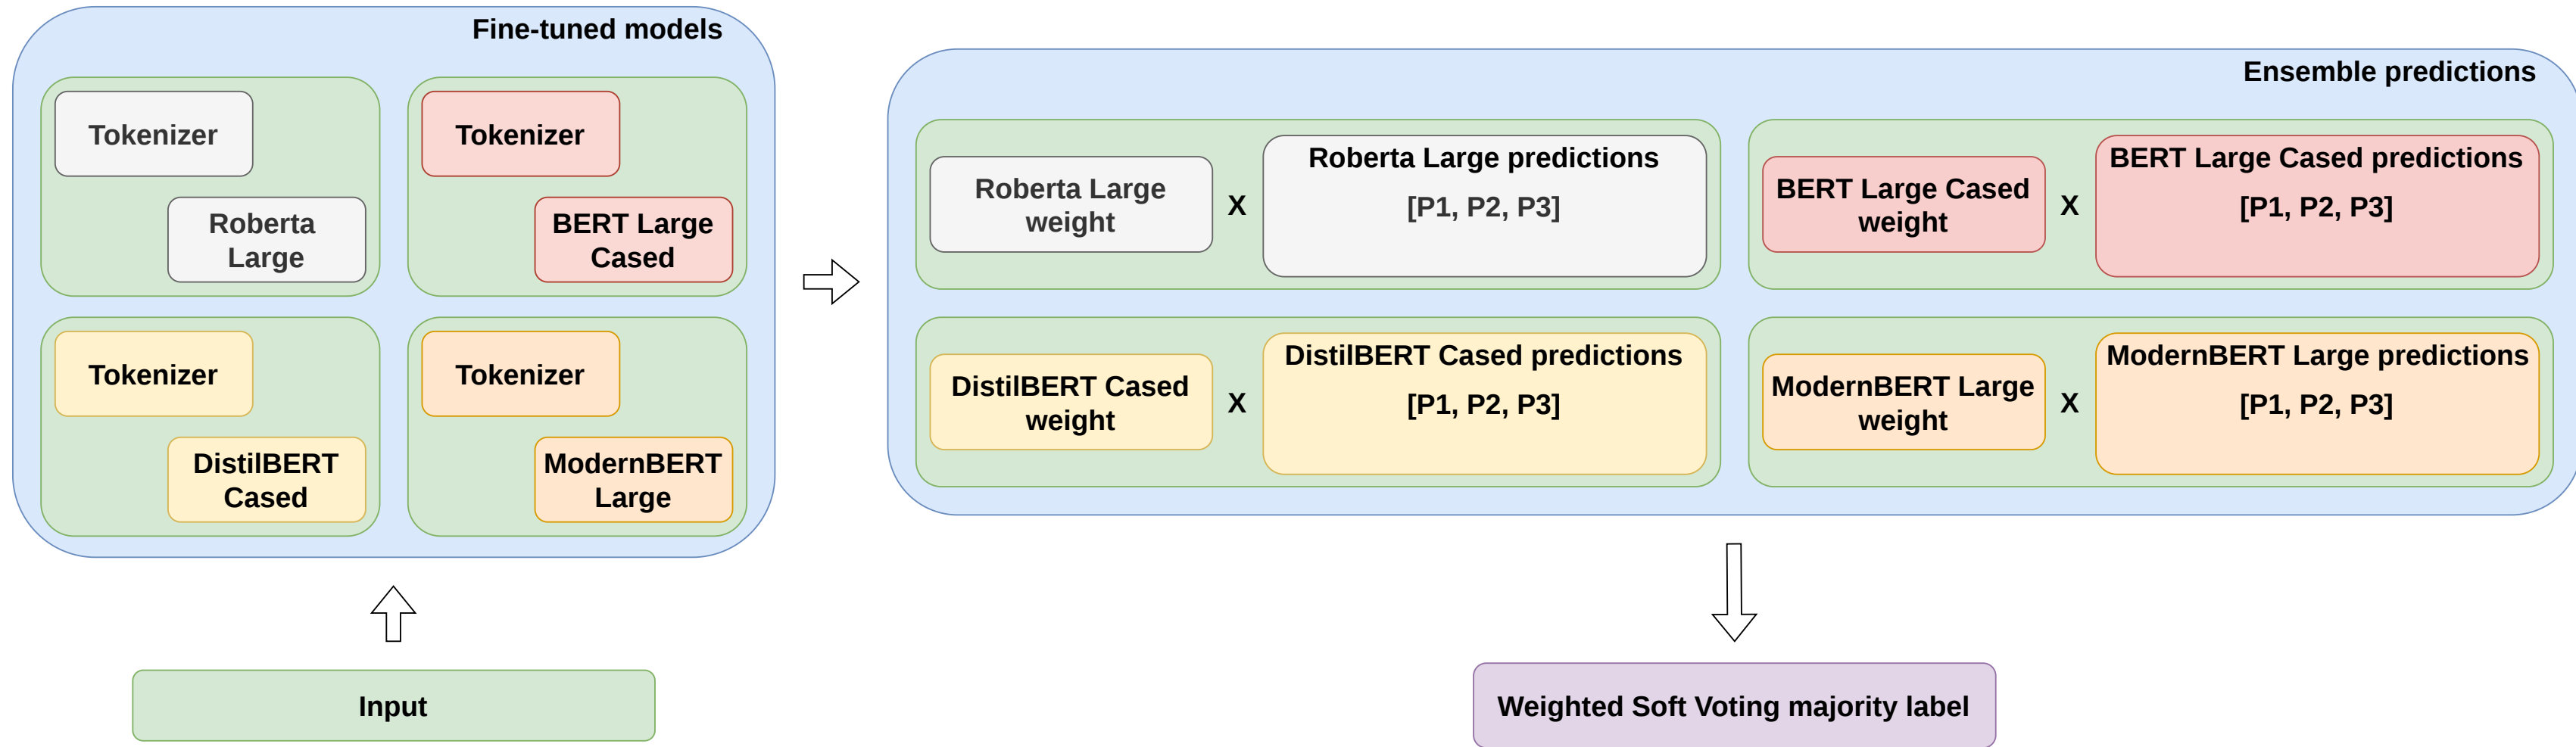

Supplement: SupplementaryMaterial [file arq-emb.pdf › arq-emb.pdf]
